# Supplementary material for: The Atonal Proneural Transcription Factor Links Differentiation and Tumor Formation in Drosophila
Source: PubMed Central journal article supplement (PMC2652389; doi:10.1371/journal.pbio.1000040), 2009-02-24
Supplement: pbio.1000040.sg001.pdf [file pbio.1000040.sg001.pdf]

# The Atonal proneural transcription factor links differentiation and tumor formation in *Drosophila*

Bossuyt *et al.*

## Supplementary figures

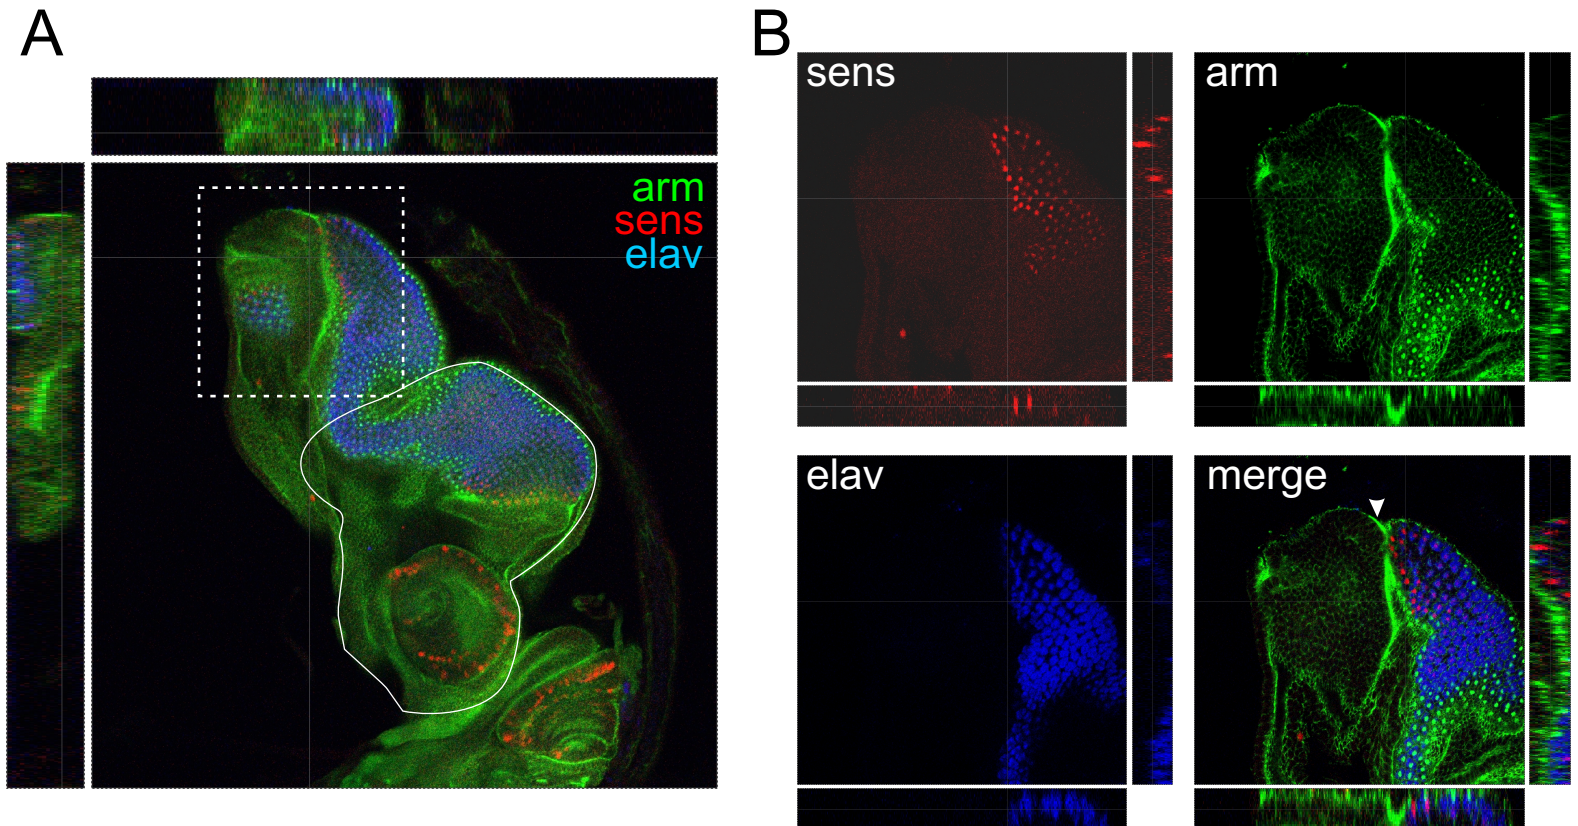

**Supplementary Figure 1: Outgrowth originates from the eye disc proper.** **A**, Third instar eyedisc of *ey-Gal4>Dl>eyeful/+*. Confocal section of antibody stained eye disc for senseless (red, indicating R8 photoreceptors), armadillo (green, indicating cell cortexes) and elav (bleu, marker of mature neurons). Respective z-stacks are indicated next to the main image. White line indicates normal outline of eye-antennal imaginal disc. The malignant outgrowth (striped square) is enlarged in b. **B**, Enlarged image from a. Respective z-stacks are indicated next to the main image. White arrow head indicates morphogenetic furrow in eye disc outgrowth. The different cell types present in a normal eye are also present in the outgrowth indicating that the outgrowth originates from undifferentiated normal eye disc tissue.
