# Supplementary material for: The Atonal Proneural Transcription Factor Links Differentiation and Tumor Formation in Drosophila
Source: PubMed Central journal article supplement (PMC2652389; doi:10.1371/journal.pbio.1000040), 2009-02-24
Supplement: pbio.1000040.sg002.pdf [file pbio.1000040.sg002.pdf]

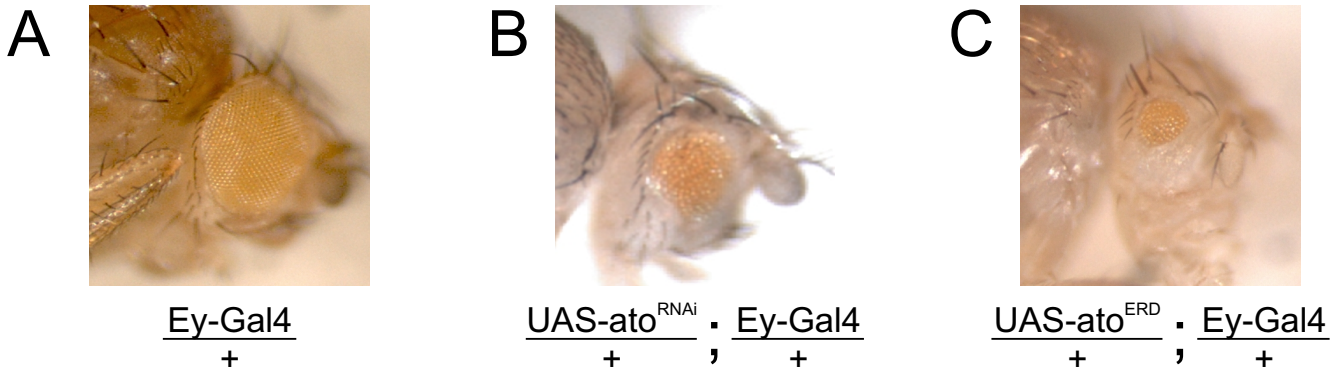

**Supplementary Figure 2: Adult loss of phenotypes of loss of *ato* function.** **A**, Representative picture *ey-Gal4*. **B**, Representative picture of *UAS-ato<sup>RNAi</sup>* driven by *ey-Gal4*. *ato<sup>RNAi</sup>* construct is active since the expression in the developing eye leads to a decrease in eye size. **C**, representative picture of *UAS-ato<sup>ERD</sup>* driven by *ey-Gal4*. The *ato<sup>ERD</sup>* leads to a phenocopy of the loss of *ato*.
