# Supplementary material for: The Atonal Proneural Transcription Factor Links Differentiation and Tumor Formation in Drosophila
Source: PubMed Central journal article supplement (PMC2652389; doi:10.1371/journal.pbio.1000040), 2009-02-24
Supplement: pbio.1000040.sg003.pdf [file pbio.1000040.sg003.pdf]

ato

dap

p-JNK

merge

wt  
+ ato

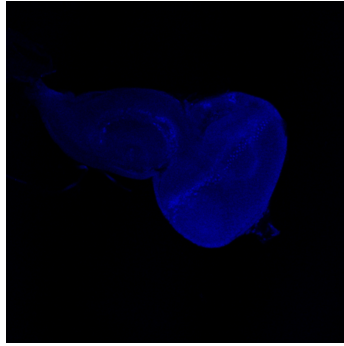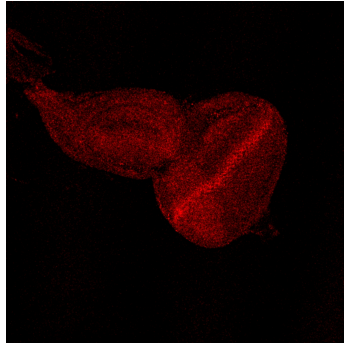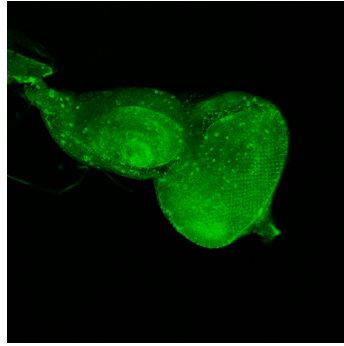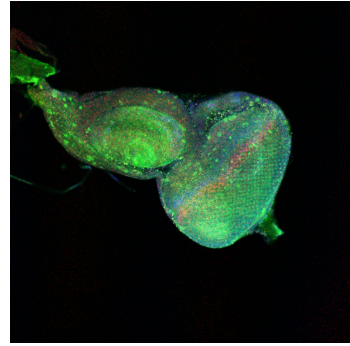

**Supplementary Figure 3: Ato, dap and pJNK expression in WT eye discs.** Expression of ato in wildtype flies, upregulates Dap and phosphorylated JNK. Third instar eye disc from eyeless-Gal4/UAS-ato
